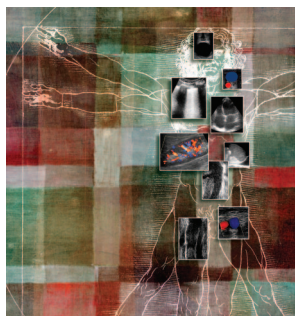

## ON THE COVER:

Ultrasound imaging facilitates many procedures in the perioperative period, and has transformed the approach to many patients in the emergency room. In this issue we present an article and editorial from Italy demonstrating the routine use of ultrasound in the critical care unit to confirm, deny, and establish new diagnoses which alter patient care.

- Pelosi and Corradi: Ultrasonography in the Intensive Care Unit: "Looking at the World through Colored Glasses," p. 696
- Manno *et al.*: Deep Impact of Ultrasound in the Intensive Care Unit: The "ICU-sound" Protocol, p. 801

## ◆ THIS MONTH IN ANESTHESIOLOGY

9A

## ◆ EDITORIAL VIEWS

- 2 **Perioperative Databases: From Data to Improvement of Outcome** 691  
*Henrik Kehlet*
- 2 **Bispectral Index *versus* Minimum Alveolar Concentration for Prevention of Intraoperative Awareness: Does a Practical Controlled Trial Provide CERTainty?** 693  
*Stavros G. Memtsoudis and Spencer S. Liu*
- 2 **Ultrasonography in the Intensive Care Unit: Looking at the World through Colored Glasses** 696  
*Paolo Pelosi and Francesco Corradi*
- Fractals in Clinical Hemodynamics** 699  
*Timothy G. Buchman*
- The Simulation-derived Algorithm: A Better Method to Achieve a Performance Consensus** 701  
*David J. Murray*

## ■ SPECIAL ANNOUNCEMENTS

- Journal-related Activities and Other Special Activities at the 2012 American Society of Anesthesiologists Annual Meeting** 703  
*Michael J. Avram, Timothy J. Brennan, Matthias Eikermann, James C. Eisenach, Shiroh Isono, and Jean Mantz*
- Ralph Lydic, Recipient of the 2012 Excellence in Research Award** 711  
*Kevin K. Tremper*
- Peter Nagele, Recipient of the 2012 Presidential Scholar Award** 714  
*Alex S. Evers*

- |                                                                   |                                    |
|-------------------------------------------------------------------|------------------------------------|
| ◆ Refers to This Month in Anesthesiology                          | 🌐 See Supplemental Digital Content |
| ◆ Refers to Editorial Views                                       | 📄 CME Article                      |
| 2 See page2anesthesiology.org for content related to this article |                                    |

## ■ PERIOPERATIVE MEDICINE

- 2** **Prevention of Intraoperative Awareness with Explicit Recall in an Unselected Surgical Population: A Randomized Comparative Effectiveness Trial** 717  
*George A. Mashour, Amy Shanks, Kevin K. Tremper, Sachin Kheterpal, Christopher R. Turner, Satya Krishna Ramachandran, Paul Picton, Christa Schueller, Michelle Morris, John C. Vandervest, Nan Lin, and Michael S. Avidan*  
 This comparative effectiveness trial was unable to determine a difference between protocols based on bispectral index values and anesthetic concentration in the prevention of intraoperative awareness in an unselected surgical population.
- 2** **Additional Cross-sectional Transesophageal Echocardiography Views Improve Perioperative Right Heart Assessment** 726  
*Jorge Kasper, Daniel Bolliger, Karl Skarvan, Peter Buser, Miodrag Filipovic, and Manfred Daniel Seeberger*  
 This prospective transesophageal echocardiographic study found that additional cross-sectional views focusing on the right heart can be obtained as reliably as standard views. Several of these views improve comprehensive imaging of the right heart.
- Marked Hyperglycemia Attenuates Anesthetic Preconditioning in Human-induced Pluripotent Stem Cell-derived Cardiomyocytes** 735  
*Scott G. Canfield, Ana Sepac, Filip Sedlic, Maria Y. Muravyeva, Xiaowen Bai, and Zeljko J. Bosnjak*  
 We used human-induced pluripotent stem cells generated from diabetic and nondiabetic donors to generate cardiomyocytes for studying anesthetic preconditioning. High glucose levels, but not genetic factors, are responsible for lack of preconditioning in diabetic cardiomyocytes. *SUPPLEMENTAL DIGITAL CONTENT IS AVAILABLE IN THE TEXT*
- Epinephrine Induces Rapid Deterioration in Pulmonary Oxygen Exchange in Intact, Anesthetized Rats: A Flow and Pulmonary Capillary Pressure-dependent Phenomenon** 745  
*Vijay Krishnamoorthy, David B. Hiller, Richard Ripper, Bocheng Lin, Stephen M. Vogel, Douglas L. Feinstein, Sarah Oswald, Leelach Rothschild, Priscilla Hensel, Israel Rubinstein, Richard Minshall, and Guy L. Weinberg*  
 Intravenous bolus administration of epinephrine rapidly induces arterial hypoxemia.
- 2** **A Perioperative Smoking Cessation Intervention with Varenicline: A Double-blind, Randomized, Placebo-controlled Trial** 755  
*Jean Wong, Amir Abrishami, Yiliang Yang, Amna Zaki, Zeev Friedman, Peter Selby, Kenneth R. Chapman, and Frances Chung*  
 A perioperative smoking cessation intervention with varenicline and counseling significantly increased short- and long-term abstinence (12 months) after elective noncardiac surgery, with no increase in serious adverse events.
- Mutations M287L and Q266I in the Glycine Receptor  $\alpha$ 1 Subunit Change Sensitivity to Volatile Anesthetics in Oocytes and Neurons, but Not the Minimal Alveolar Concentration in Knockin Mice** 765  
*Cecilia M. Borghese, Wei Xiong, S. Irene Oh, Angel Ho, S. John Mihic, Li Zhang, David M. Lovinger, Gregg E. Homanics, Edmond I. Eger 2nd, and R. Adron Harris*  
 Inhaled anesthetics similarly immobilized wild-type mice and mice carrying mutated  $\alpha$ 1 glycine receptor subunits with differential sensitivity to isoflurane, indicating these receptors are not important for the action of inhaled anesthetics.
- 2** **Deficits in Retention for Verbally Presented Medical Information** 772  
*Elisabeth H. Sandberg, Ritu Sharma, and Warren S. Sandberg*  
 Healthy subjects remember only a fraction of verbally presented medical information, despite evidence that the information was initially encoded. In a free recall situation, mimicking actual patients' experience, only about 20% of information is remembered.

## **γ-Aminobutyric Acid Receptor Type A Receptor Potentiation Reduces Firing of Neuronal Assemblies in a Computational Cortical Model** 780

*Kingsley P. Storer and George N. Reeke*

In a computational model of the cortex,  $\bar{\alpha}$ -aminobutyric acid receptor type A receptor potentiation reduces formation of neuronal groups. This process may underlie the ability of propofol to abolish new memory formation and consciousness.

## **Roles of Aldosterone and Oxytocin in Abnormalities Caused by Sevoflurane Anesthesia in Neonatal Rats** 791

*Wengang Cao, Christopher Pavlinec, Nikolaus Gravenstein, Christoph N. Seubert, and Anatoly E. Martynyuk*

The developmental effects of neonatal anesthesia with sevoflurane may involve both central and peripheral actions of the anesthetic and subsequent increases in neuronal activity.

### ■ CRITICAL CARE MEDICINE

## **Deep Impact of Ultrasound in the Intensive Care Unit: The “ICU-sound” Protocol** 801

*Emilpaolo Manno, Mauro Navarra, Luciana Faccio, Mohsen Motevallian, Luca Bertolaccini, Abdou Mfochivè, Marco Pesce, and Andrea Evangelista*

The aim of this study was to determine whether ultrasound examination can be performed to detect occult anomalies, to prompt urgent changes in therapy or induce further testing or interventions, and to confirm or modify diagnosis of patients admitted to a general intensive care unit. One hundred twenty-five consecutive patients were assessed under a critical care ultrasonography protocol, and the data were analyzed prospectively. Systematic ultrasound examination of the optic nerve, thorax, heart, abdomen, and venous system prompted further testing in 23/125 patients (18.4%) and led to changes in medical therapy in 22/125 (17.6%) and to invasive procedures in 27/125 (21.6%). The highest number of new ultrasound abnormalities was detected in patients with septic shock. This ultrasound protocol holds potential for improving health care quality.

## **Multifractal Analysis of Hemodynamic Behavior: Intraoperative Instability and Its Pharmacological Manipulation** 810

*Steven M. Bishop, Sarah I. Yarham, Vilas U. Navapurkar, David K. Menon, and Ari Ercole*

Intraoperative heart rate and blood pressure fluctuations were characterized using multifractal techniques. Physiological instability is characterized by increased signal complexity, suggesting that homeokinetic mechanisms are recruited. Underlying system dynamics are amenable to pharmacological manipulation. *SUPPLEMENTAL DIGITAL CONTENT IS AVAILABLE IN THE TEXT*

## **Alveolar Macrophages and Toll-like Receptor 4 Mediate Ventilated Lung Ischemia Reperfusion Injury in Mice** 822

*Arun Prakash, Kailin R. Mesa, Kevin Wilhelmsen, Fengyun Xu, Jeffrey M. Dodd-o, and Judith Hellman*

Alveolar macrophages and toll-like receptor 4 are required for inflammatory cytokine production and neutrophil recruitment in ventilated lung ischemia reperfusion injury in mice. *SUPPLEMENTAL DIGITAL CONTENT IS AVAILABLE IN THE TEXT*

## **Intralipid, a Clinically Safe Compound, Protects the Heart Against Ischemia-Reperfusion Injury More Efficiently Than Cyclosporine-A** 836

*Jingyuan Li, Andrea Iorga, Salil Sharma, Ji-Youn Youn, Rod Partow-Navid, Soban Umar, Hua Cai, Siamak Rahman, and Mansoureh Eghbali*

Although intralipid inhibits the mitochondrial permeability transition pore opening as efficiently as cyclosporine-A by increasing mitochondrial resistance to  $\text{Ca}^{2+}$  overload and reducing mitochondrial superoxide production, intralipid is also more effective in protecting the heart against ischemia-reperfusion injury than cyclosporine-A.

## CONTENTS

### ■ PAIN MEDICINE

#### **Sensation of Abdominal Pain Induced by Peritoneal Carcinomatosis Is Accompanied by Changes in the Expression of Substance P and $\mu$ -Opioid Receptors in the Spinal Cord of Mice** 847

Masami Suzuki, Minoru Narita, Minami Hasegawa, Sadayoshi Furuta, Tomoyuki Kawamata, Maho Ashikawa, Kanako Miyano, Kazuyoshi Yanagihara, Fumiko Chiwaki, Takahiro Ochiya, Tsutomu Suzuki, Motohiro Matoba, Hiroki Sasaki, and Yasuhito Uezono

Mice with peritoneal carcinomatosis exhibit hypersensitivity to mechanical stimulation and visceral pain-like behavior, which is accompanied by an increase in the expression of substance P and the down-regulation of  $\mu$ -opioid receptors.

#### **Quantitative Changes in Regional Cerebral Blood Flow Induced by Cold, Heat and Ischemic Pain: A Continuous Arterial Spin Labeling Study** 857

Michael A. Frölich, Hrishikesh Deshpande, Timothy Ness, and Georg Deutsch

It was observed that quantitative regional cerebral blood flow changes in response to pain evoke consistent regional cerebral blood flow change in Brodmann area 6, an area responsible for the integration of a motor activity.

#### **Effect of Subanesthetic Ketamine on Intrinsic Functional Brain Connectivity: A Placebo-controlled Functional Magnetic Resonance Imaging Study in Healthy Male Volunteers** 868

Marieke Niesters, Najmeh Khalili-Mahani, Christian Martini, Leon Aarts, Joop van Gerven, Mark A. van Buchem, Albert Dahan, and Serge Rombouts

Resting-state functional magnetic resonance imaging is a useful and efficient method for assessing drug effect on the brain. Ketamine induced connectivity changes in brain areas involved in motor function, psychedelic effects, and pain processing.

### ■ EDUCATION

#### IMAGES IN ANESTHESIOLOGY

##### **A 28-year-old Man with Air in the Mediastinal Space after a Car Accident** 878

Martijn Brakman, K. Tim Buddingh, Marije Smit, Michel M. R. F. Struys, Jan G. Zijlstra, and Matijs van Meurs

##### **Hemodynamic Effects of Aortocaval Compression and Uterine Contractions in a Parturient with Left Ventricular Outflow Tract Obstruction** 879

Emily J. Baird and Valerie A. Arkoosh

#### ANESTHESIA LITERATURE REVIEW 880

#### ORIGINAL INVESTIGATIONS IN EDUCATION

##### **Unanticipated Difficult Airway in Obstetric Patients: Development of a New Algorithm for Formative Assessment in High-fidelity Simulation** 883

Mrinalini Balki, Mary Ellen Cooke, Susan Dunington, Aliya Salman, and Eric Goldszmidt

This study illustrates the development of a new consensus-based algorithm for the management of unanticipated difficult airway in obstetric patients, and demonstrates its feasibility in formative assessment using high-fidelity simulation.

#### CLINICAL CONCEPTS AND COMMENTARY

##### **Acquired Liver Injury in the Intensive Care Unit** 898

Thomas Lescot, Constantine Karvellas, Marc Beaussier, and Sheldon Magder

In critically ill patients, hepatic impairment can occur. The authors review the causes and mechanisms of acquired liver injury in the intensive care unit and discuss possible clinical implications.

#### MIND TO MIND

##### **Walking to Danville** 905

Gregory L. Rose

**Fragment One** 908

*Jonathan L. T. Munro*

**Losing My Grip** 910

*Christopher Wiley*

■ **CORRESPONDENCE**

**Comparative Performance of Direct and Video Laryngoscopes in Patients with Predicted Difficult Airway** 911

*Fu-Shan Xue, Xu Liao, and Jian-Hua Liu*

**At Higher Risk of Difficulty Is Not True Difficulty: The Challenge of Device Performance Assessment in the Difficult Airway**

*David W. Healy*

**In Reply**

*Michael Aziz and Ansgar Brambrink*

**Tracheal Intubation Performed with GlideScope® Video Laryngoscope and Direct Laryngoscopy in Neonates and Infants** 914

*Fu-Shan Xue, Yi Cheng, and Qiang Wang*

**In Reply**

*John E. Fiadjo, Paul Stricker, and Harshad Gurnaney*

**Whole Blood: More than the Sum of the Parts** 915

*Andrew D. Pitkin and Mark J. Rice*

**In Reply**

*Richard B. Weiskopf*

**‘Evidence’ for Practice Guidelines for Central Venous Access?** 916

*Evan G. Pivalizza, Sam D. Gumbert, Brian Marasigan, and Sara Guzman-Reyes*

**Removal of Central Venous Catheters**

*Mark T. Keegan and Jeff T. Mueller*

**In Reply**

*Stephen M. Rupp, Jeffrey L. Apfelbaum, Richard T. Connis, and David G. Nickinovich, on behalf of the American Society of Anesthesiologists Task Force on Central Venous Access.*

**Alternatives to Preoperative Transfusion Should Be Preferred in Anemic Cardiac Surgical Patients Instead of Useless Transfusion** 919

*David Faraoni, Yannick Ciccarella, and Philippe Van der Linden*

**In Reply**

*Keyvan Karkouti, Duminda N. Wijesundera, Terrence M. Yau, Stuart A. McCluskey, Christopher T. Chan, Mark A. Crowther, and W. Scott Beattie*

## CONTENTS

**Table Your Contaminated Equipment during Induction** 922  
*Thomas M. Chalifoux and Matthew P. Feuer*

**In Reply**

*Elise M. Mecham and Harriet W. Hopf*

**Neurotoxicity: Rats *versus* Neonates** 923  
*Maurice Lippmann and Timothy Van Natta*

**In Reply**

*Andrew J. Davidson and Suellen M. Walker*

■ ANESTHESIOLOGY REFLECTIONS FROM THE WOOD LIBRARY-MUSEUM

**Uncle Sam and Massachusetts General Hospital** 710  
*George S. Bause*

**Cocaine/Eucaine Sales Register: *Déjà Vu* or *Tête-bêche*?** 809  
*George S. Bause*

**Not a 7% Solution: A “20% Cocain” Syringe** 821  
*George S. Bause*

**A Dental Anesthetic for Tolerating a Stranger in the Dark?** 867  
*George S. Bause*

■ REVIEWS OF EDUCATIONAL MATERIAL 926

■ CAREERS & EVENTS 29A

### INSTRUCTIONS FOR AUTHORS

The most recently updated version of the Instructions for Authors is available at [www.anesthesiology.org](http://www.anesthesiology.org). Please refer to the Instructions for the preparation of any material for submission to ANESTHESIOLOGY.

Manuscripts submitted for consideration for publication must be submitted in electronic format. The preferred method is *via* the Journal's Web site (<http://www.anesthesiology.org>). Detailed directions for submissions and the most recent version of the Instructions for Authors can be found on the Web site (<http://www.anesthesiology.org>). Books and educational materials should be sent to Michael J. Avram, Ph.D., Department of Anesthesiology, Northwestern University Feinberg School of Medicine, Ward Memorial Building, Room 13-199, 303 East Chicago Avenue, Chicago, IL 60611-3008. Requests for permission to duplicate materials published in ANESTHESIOLOGY should be submitted in electronic format, to the Permissions Department ([journalpermissions@lww.com](mailto:journalpermissions@lww.com)). All articles accepted for publication are done so with the understanding that they are contributed exclusively to this Journal and become the property of the American Society of Anesthesiologists, Inc. Statements or opinions expressed in the Journal reflect the views of the author(s) and do not represent official policy of the American Society of Anesthesiologists unless so stated. Advertising and related correspondence should be addressed to Advertising Manager, ANESTHESIOLOGY, Lippincott Williams & Wilkins, Two Commerce Square, 2001 Market Street, Philadelphia, Pennsylvania 19103 (Web site: <http://www.lww.com/advertisingratecards/>). Publication of an advertisement in ANESTHESIOLOGY does not constitute endorsement by the Society or Lippincott Williams & Wilkins, Inc. of the product or service described therein or of any representations made by the advertiser with respect to the product or service.
